# Supplementary material
Source: PubMed Central journal article supplement (PMC2829438)

**Supplementary Table 1**

| AB1:OB18* ratio                            | 25:75                             | 50:50                             | 75:25                             |
|--------------------------------------------|-----------------------------------|-----------------------------------|-----------------------------------|
| AB1 Area Fraction in Polymersomes          | $0.22 \pm 0.10$<br>(S.D., n = 5)  | $0.48 \pm 0.08$<br>(S.D., n = 11) | $0.76 \pm 0.03$<br>(S.D., n = 3)  |
| OB18* Length Fraction in Cylinder Micelles | $0.76 \pm 0.12$<br>(S.D., n = 31) | $0.58 \pm 0.09$<br>(S.D., n = 15) | $0.22 \pm 0.10$<br>(S.D., n = 27) |

**Supplemental Figure 1 Removal of AB1 domains by chelation of  $\text{Ca}^{2+}$  with EDTA**

25:75 = AB1:OB18\*

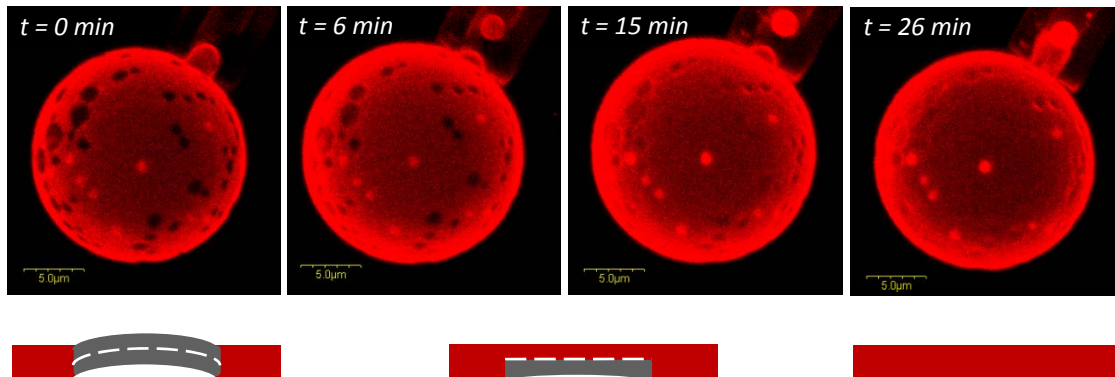

**Supplemental Figure 2** Fluorescence intensity analysis of unmodified images of PIP2-BodipyFL enrichment in AB1 domains of phase separated polymersomes.

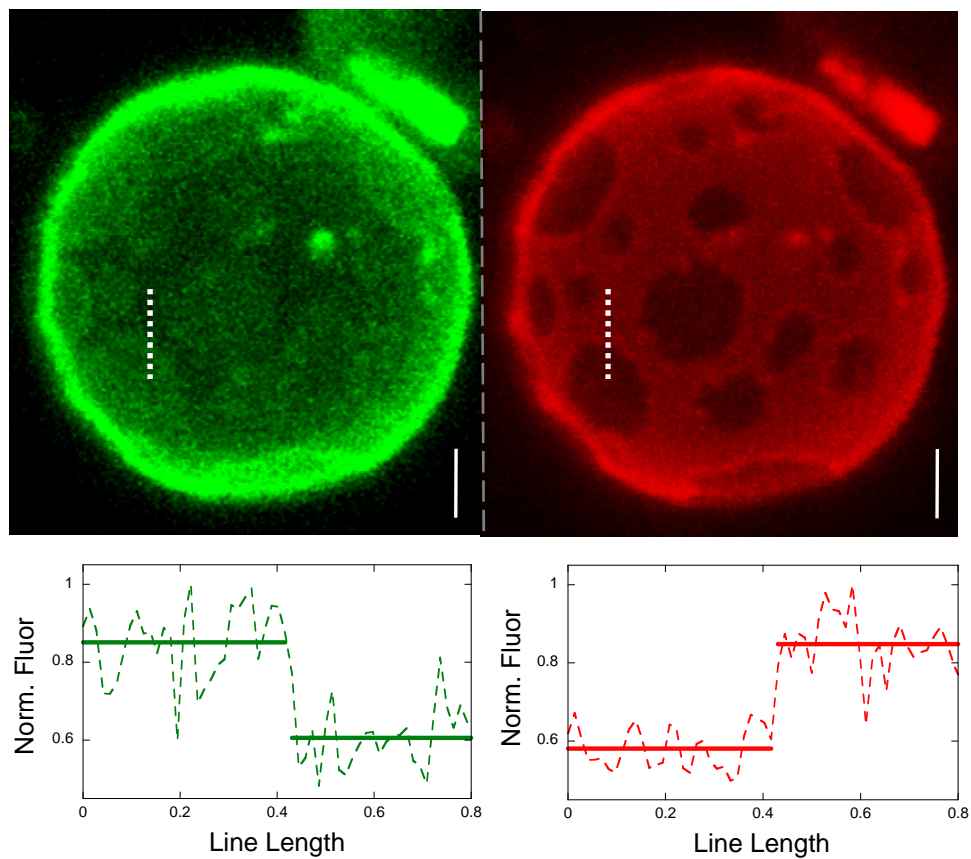

**Supplemental Figure 3 Copper induced morphological changes in pure AB1 assemblies and domain formation in vesicles of AB1:OB18\* = 50:50**

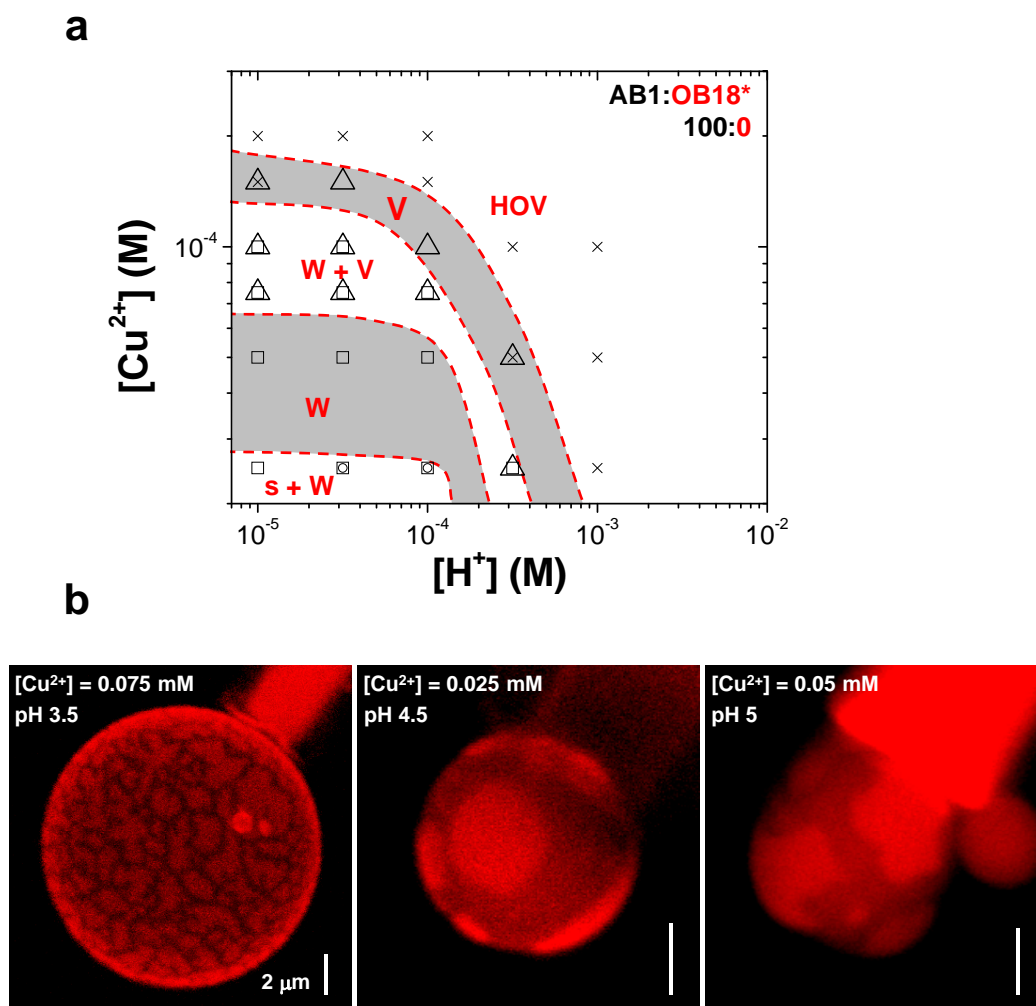

Supplemental Figure 4 Effective diffusivity of Nile Red in pure AB1 polymersomes.

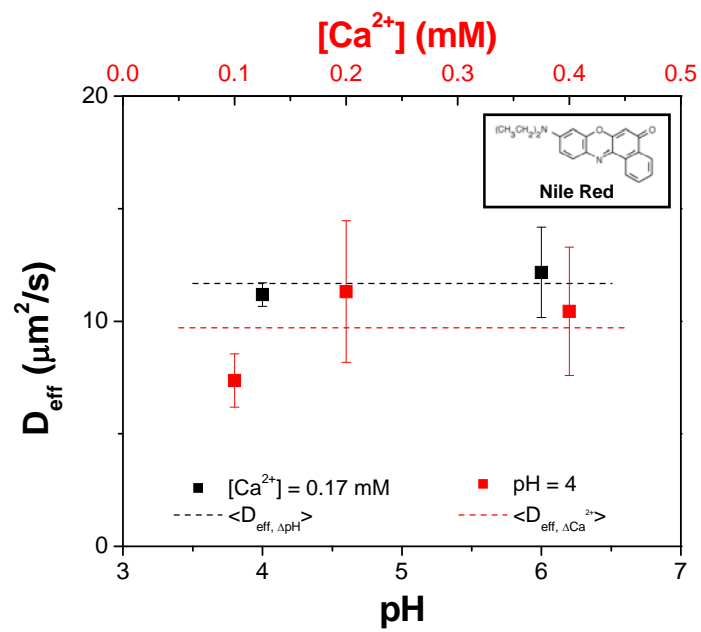

Supplemental Figure 5 Analysis of striped worm-like micelles.

AB1:OB18\*

25:75

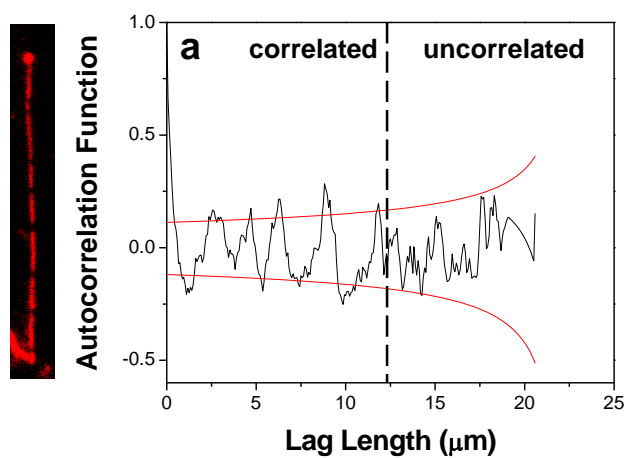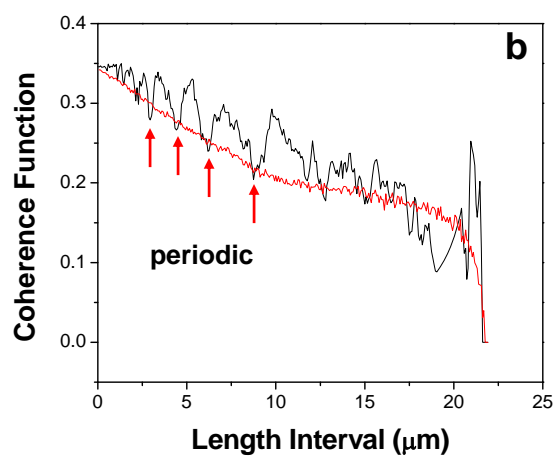

50:50

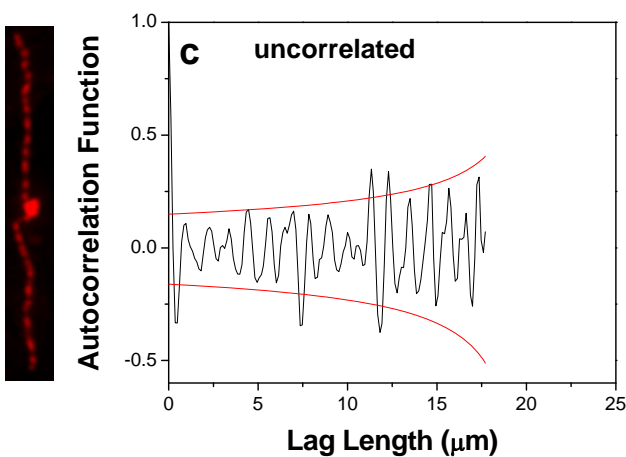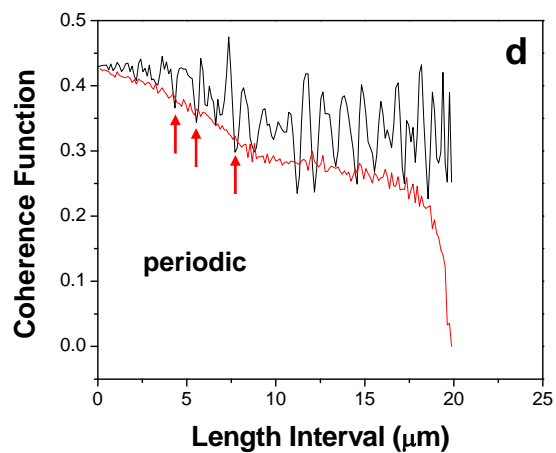

75:25

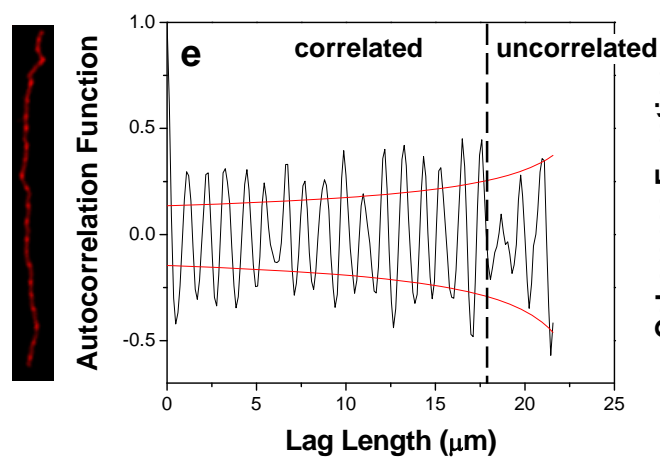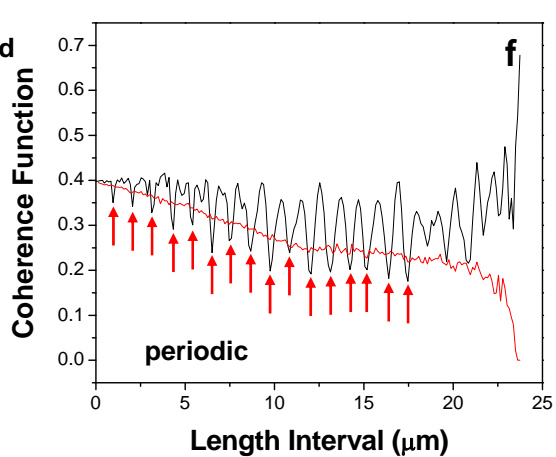

Supplementary Figure 6 Details of phase diagram for (a) AB1:OB18\* = 25:75 lateral segregation and (b) calcium induced AB1 morphology changes

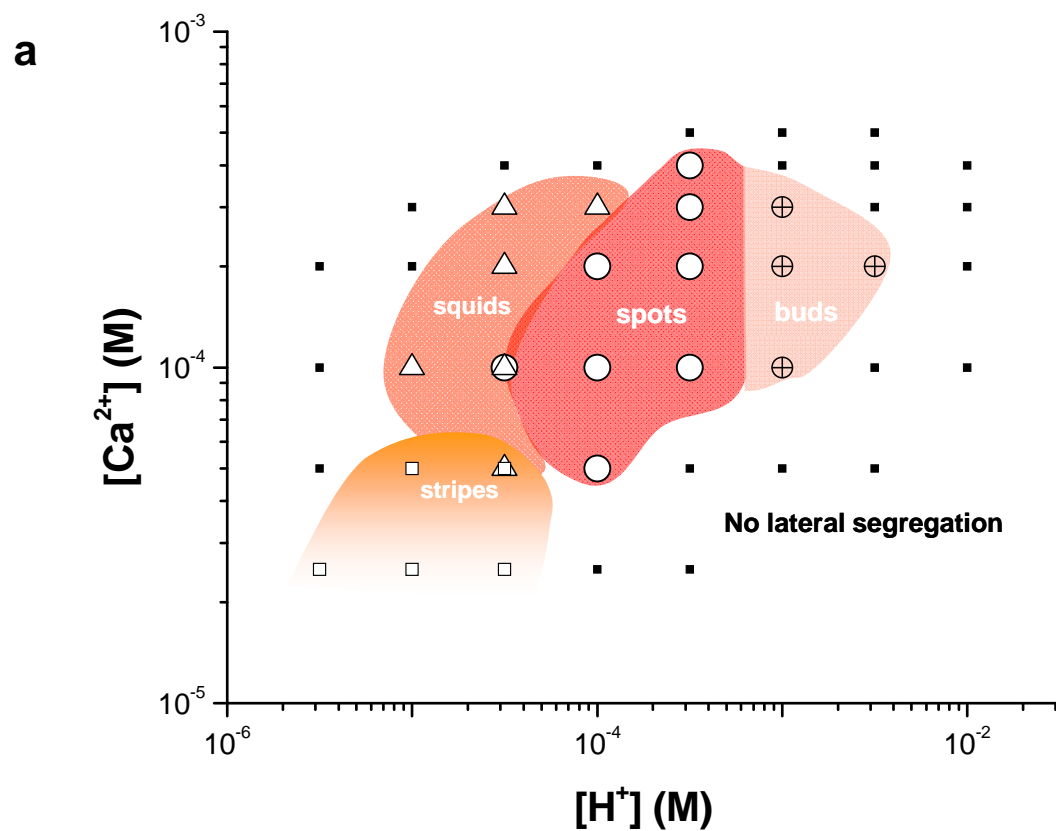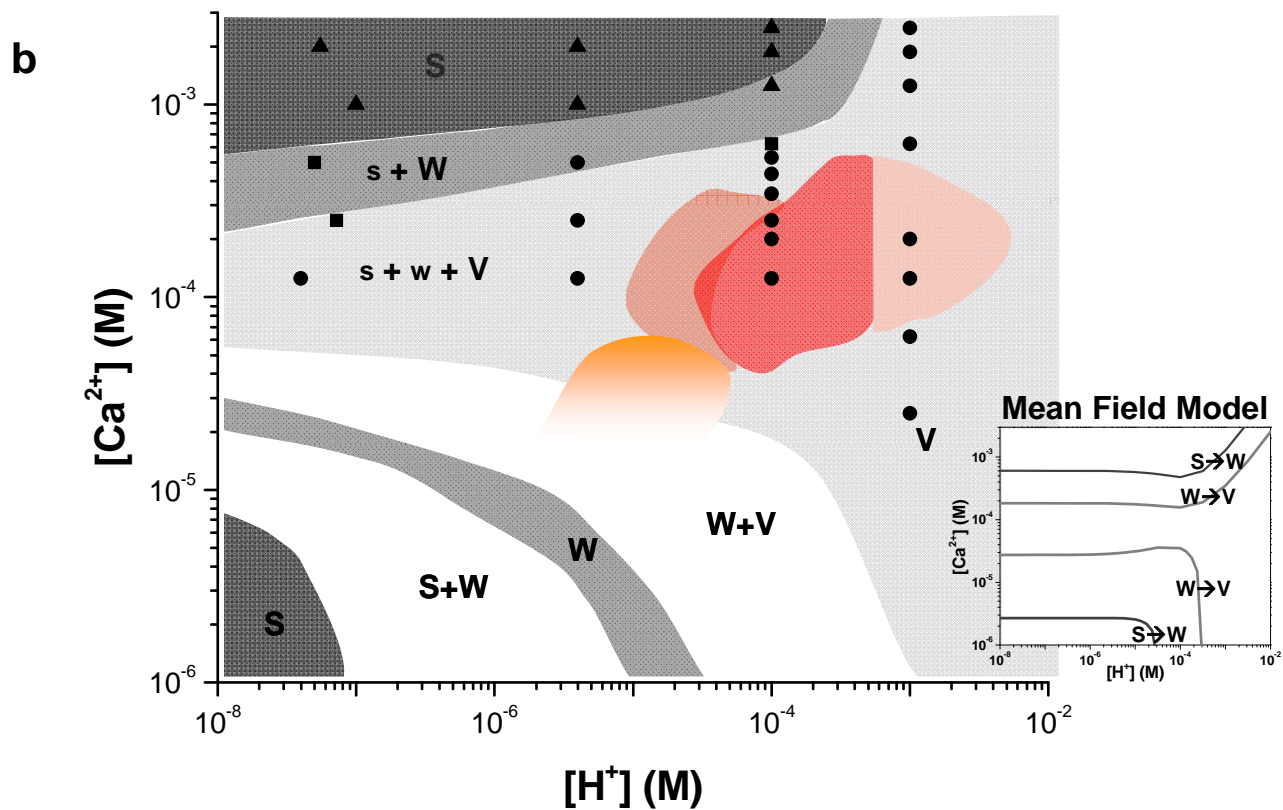

**Supplementary Figure 7 Calcium-induced phase separation of the highly anionic lipid, PIP2, in lipid giant unilamellar vesicles as a function of pH.**

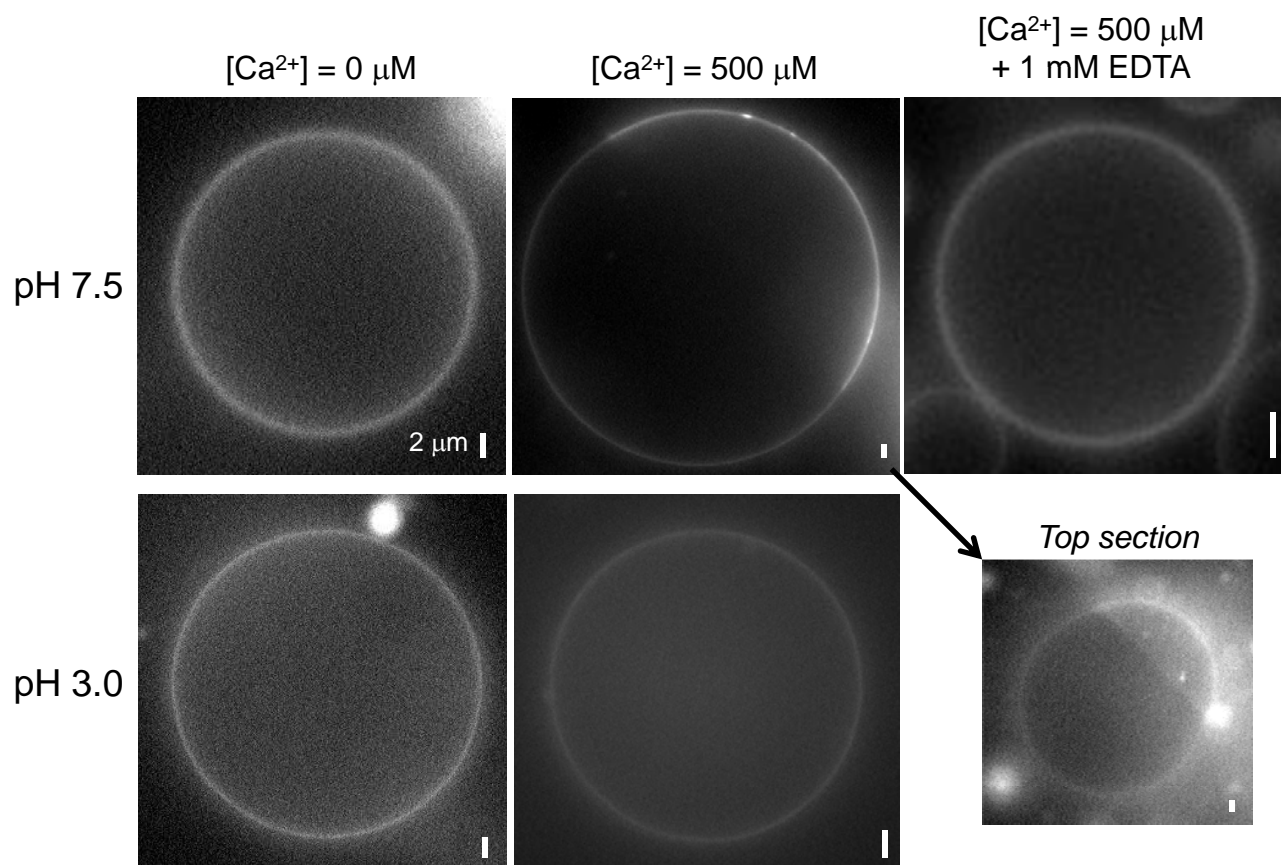

**Supplementary Figure 8 Domain stability in phase separated polymersomes near physiological conditions**

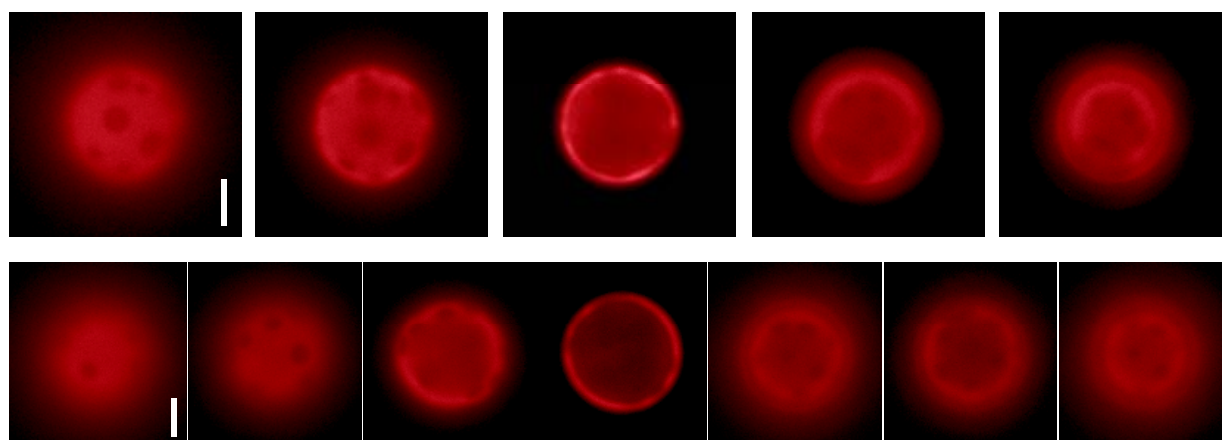

## Possible Thumbnail images

Soft gelation → Low line tension fingering by adding NaOH

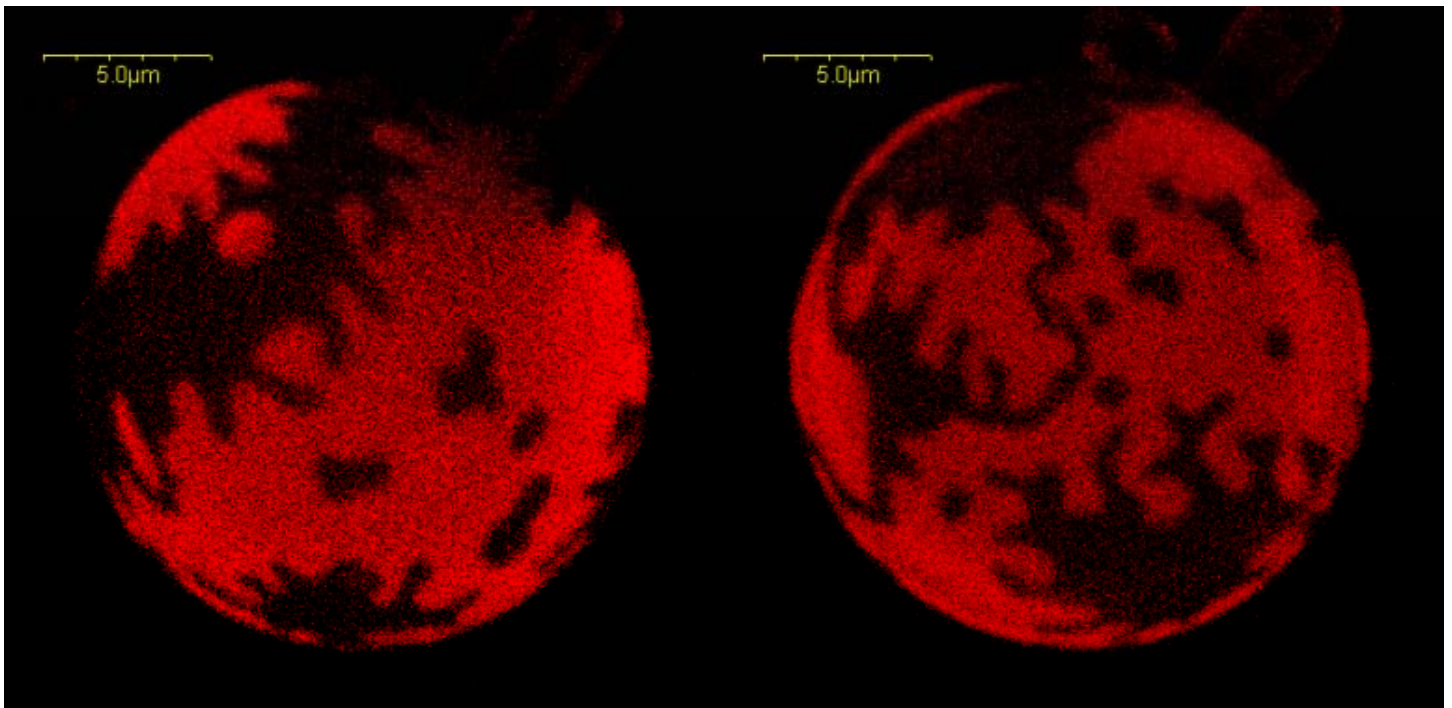

## Possible Thumbnail images

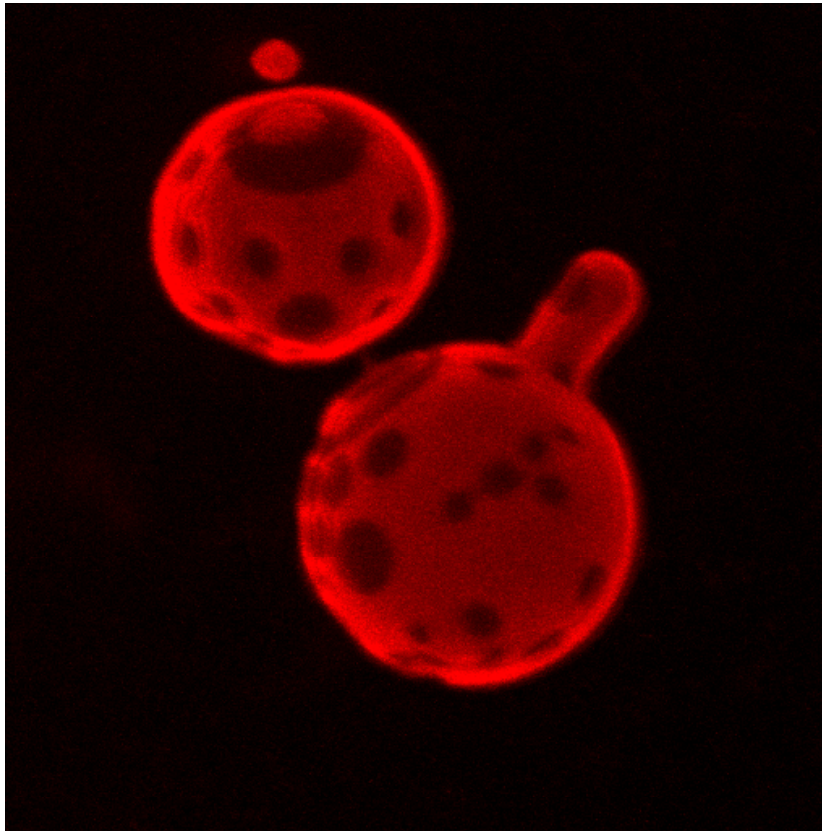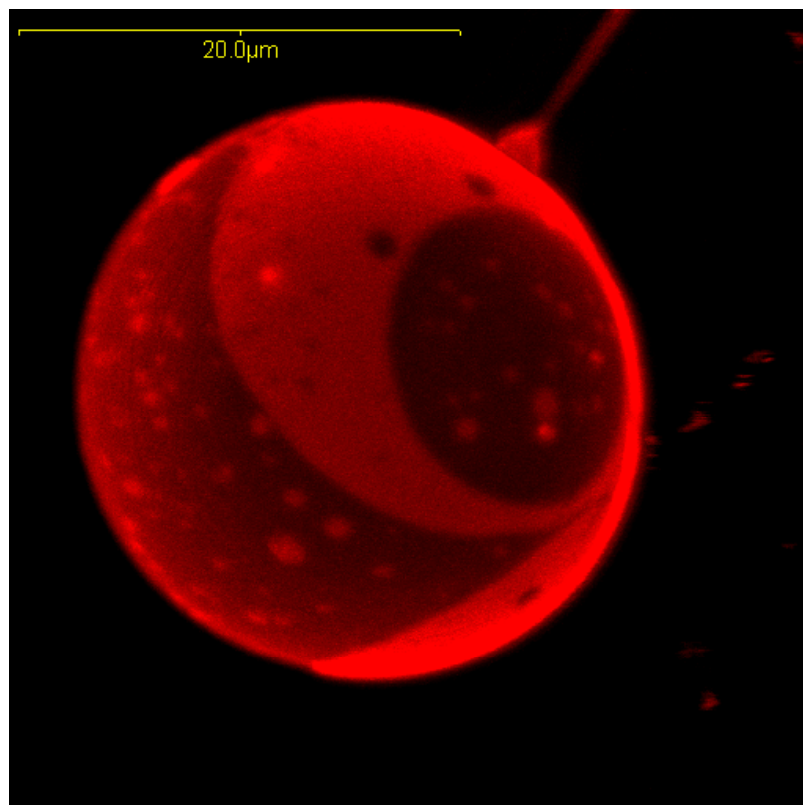

Supplement: NIHMS132392-supplement-2.pdf [file NIHMS132392-supplement-2.pdf]
